# Supplementary material for: Evidence that agricultural use of pesticides selects pyrethroid resistance within Anopheles gambiae s.l. populations from cotton growing areas in Burkina Faso, West Africa
Source: PubMed Central journal article supplement (PMC5333875; doi:10.1371/journal.pone.0173098), 2017-03-02
Supplement: pone.0173098.s001.pdf [file pone.0173098.s001.pdf]

# RAPPORT D'ANALYSE N°

**DEPARTEMENT CHARGE DU CONTRÔLE :**  
**Direction de la Toxicologie, du Contrôle**  
**de l'Environnement et de l'hygiène Publique**

-----  
Service des Contaminants, de Pesticides et des Engrais

Codes clients : 00751/001-00752/001-00753/001-00754/001-00755/001-  
00762/001- 00763/001-00764/001-00765/001  
Date du prélèvement : 16-10-2013  
Lieu du prélèvement : Compla 1, Compla 2 et Dayere  
Date de réception : 12-08-2013  
But des analyses : Recherche de résidus de pesticides  
Période d'analyse : Du 29 octobre 17 décembre 2013  
Identité du préleveur : Client  
Nature des échantillons : Eau

---

**Avertissement : Ce document ne doit pas être reproduit sans autorisation écrite du LNSP.**  
***Ce rapport d'analyse n'est valable que pour l'échantillon analysé.***  
**00751-00752-00753-00754-00755-00762-00763-00764-00765/001 Echantillons d'eaux**

| Pesticides Recherchés                       | Méthodes                                        | Désignation et résultats          |                                   |                                  |                                  |                                 |                                    |                                    |                                    |                                    |                                  | Valeurs guides **<br>(µg/l) |
|---------------------------------------------|-------------------------------------------------|-----------------------------------|-----------------------------------|----------------------------------|----------------------------------|---------------------------------|------------------------------------|------------------------------------|------------------------------------|------------------------------------|----------------------------------|-----------------------------|
|                                             |                                                 | 00751/001<br>CONV 5 /<br>Compla 2 | 00752/001<br>CONV 6 /<br>Compla 2 | 00753/001<br>BIO 1 /<br>Compla 1 | 00754/001<br>BIO 2 /<br>Compla 1 | 00755/001<br>BIO. 3 /<br>Dayere | 00762/001<br>CONV. 1 /<br>Compla 2 | 00763/001<br>CONV. 2 /<br>Compla 2 | 00764/001<br>CONV. 3 /<br>Compla 2 | 00765/001<br>CONV. 4 /<br>Compla 2 | 00761/001<br>CONV. 6 /<br>Dayere |                             |
| <b>PYRETHRINOIDE DE SYNTHESE</b>            | Méthode<br>Multi résidus<br>d'origine<br>DFG*** |                                   |                                   |                                  |                                  |                                 |                                    |                                    |                                    |                                    |                                  |                             |
| Cypermethrine                               |                                                 | < LD*                             | < LD*                             | < LD*                            | < LD*                            | < LD*                           | < LD*                              | < LD*                              | < LD*                              | < LD*                              | < LD*                            | -                           |
| Deltamethrine                               |                                                 | < LD*                             | < LD*                             | < LD*                            | < LD*                            | < LD*                           | < LD*                              | < LD*                              | < LD*                              | < LD*                              | <b>0,0147</b>                    | -                           |
| Lamda Cyhalothrine                          |                                                 | < LD*                             | < LD*                             | < LD*                            | < LD*                            | < LD*                           | < LD*                              | < LD*                              | < LD*                              | < LD*                              | <b>1,49</b>                      | -                           |
| Permethrine                                 |                                                 | < LD*                             | < LD*                             | < LD*                            | < LD*                            | < LD*                           | < LD*                              | < LD*                              | < LD*                              | < LD*                              | < LD*                            | -                           |
| Tetramethrine                               |                                                 | < LD*                             | < LD*                             | < LD*                            | < LD*                            | < LD*                           | < LD*                              | < LD*                              | < LD*                              | < LD*                              | < LD*                            | -                           |
| <b>ORGANOPHOSPHORES / COMPOSES AZOTES :</b> |                                                 |                                   |                                   |                                  |                                  |                                 |                                    |                                    |                                    |                                    |                                  |                             |
| Chlorpyrifos ethyl                          |                                                 | < LD*                             | < LD*                             | < LD*                            | < LD*                            | < LD*                           | < LD*                              | < LD*                              | < LD*                              | < LD*                              | < LD*                            | -                           |
| Chlorpyrifos methyl                         |                                                 | < LD*                             | < LD*                             | < LD*                            | < LD*                            | < LD*                           | < LD*                              | < LD*                              | < LD*                              | < LD*                              | < LD*                            | -                           |
| Diazinon                                    |                                                 | < LD*                             | < LD*                             | < LD*                            | < LD*                            | < LD*                           | < LD*                              | < LD*                              | < LD*                              | < LD*                              | < LD*                            | -                           |
| Dichlorvos                                  |                                                 | < LD*                             | < LD*                             | < LD*                            | < LD*                            | < LD*                           | < LD*                              | < LD*                              | < LD*                              | < LD*                              | < LD*                            | -                           |
| Dimethoate                                  |                                                 | < LD*                             | < LD*                             | < LD*                            | < LD*                            | < LD*                           | < LD*                              | < LD*                              | < LD*                              | < LD*                              | < LD*                            | -                           |
| Fenitrothion                                |                                                 | < LD*                             | < LD*                             | < LD*                            | < LD*                            | < LD*                           | < LD*                              | < LD*                              | < LD*                              | < LD*                              | < LD*                            | -                           |
| Fipronil                                    |                                                 | < LD*                             | < LD*                             | < LD*                            | < LD*                            | < LD*                           | < LD*                              | < LD*                              | < LD*                              | < LD*                              | < LD*                            | -                           |
| Malathion                                   |                                                 | < LD*                             | < LD*                             | < LD*                            | < LD*                            | < LD*                           | < LD*                              | < LD*                              | < LD*                              | < LD*                              | < LD*                            | -                           |
| Methidathion                                |                                                 | < LD*                             | < LD*                             | < LD*                            | < LD*                            | < LD*                           | < LD*                              | < LD*                              | < LD*                              | < LD*                              | < LD*                            | -                           |
| Omethoate                                   |                                                 | < LD*                             | < LD*                             | < LD*                            | < LD*                            | < LD*                           | < LD*                              | < LD*                              | < LD*                              | < LD*                              | < LD*                            | -                           |
| Parathion ethyl                             |                                                 | < LD*                             | < LD*                             | < LD*                            | < LD*                            | < LD*                           | < LD*                              | < LD*                              | < LD*                              | < LD*                              | < LD*                            | -                           |
| Pyridaphenthion                             |                                                 | < LD*                             | < LD*                             | < LD*                            | < LD*                            | < LD*                           | < LD*                              | < LD*                              | < LD*                              | < LD*                              | < LD*                            | -                           |
| Pyrimiphos methyl                           |                                                 | < LD*                             | < LD*                             | < LD*                            | < LD*                            | < LD*                           | < LD*                              | < LD*                              | < LD*                              | < LD*                              | < LD*                            | -                           |
| <b>CARBAMATES et AUTRES:</b>                |                                                 |                                   |                                   |                                  |                                  |                                 |                                    |                                    |                                    |                                    |                                  |                             |
| Imazalil                                    | < LD*                                           | < LD*                             | < LD*                             | < LD*                            | < LD*                            | < LD*                           | < LD*                              | < LD*                              | < LD*                              | < LD*                              | -                                |                             |
| Quintozene                                  | < LD*                                           | < LD*                             | < LD*                             | < LD*                            | < LD*                            | < LD*                           | < LD*                              | < LD*                              | < LD*                              | < LD*                              | -                                |                             |

(\*) : Limite de Détection

(\*\*\*) : DFG : Deutsche Forschungsgemeinschaft

**Avertissement : Ce document ne doit pas être reproduit sans autorisation écrite du LNSP.**

***Ce rapport d'analyse n'est valable que pour l'échantillon analysé.***

**00751-00752-00753-00754-00755-00762-00763-00764-00765/001 Echantillons d'eaux**

**Le Chef de service des  
Contaminants, des Pesticides  
et des Engrais**

**Le Directeur de la Toxicologie  
du Contrôle de l'Environnement  
et de l'Hygiène Publique P/O**

---

**Avertissement : Ce document ne doit pas être reproduit sans autorisation écrite du LNSP.  
Ce rapport d'analyse n'est valable que pour l'échantillon analysé.  
00751-00752-00753-00754-00755-00762-00763-00764-00765/001 Echantillons d'eaux**
