# Supplementary material for: Evidence that agricultural use of pesticides selects pyrethroid resistance within Anopheles gambiae s.l. populations from cotton growing areas in Burkina Faso, West Africa
Source: PubMed Central journal article supplement (PMC5333875; doi:10.1371/journal.pone.0173098), 2017-03-02
Supplement: pone.0173098.s002.pdf [file pone.0173098.s002.pdf]

# RAPPORT D'ANALYSE N°

**DEPARTEMENT CHARGE DU CONTRÔLE :**  
**Direction de la Toxicologie, du Contrôle**  
**de l'Environnement et de l'hygiène Publique**

-----  
Service des Contaminants, de Pesticides et des Engrais

Codes clients : 00746/001-00747/001-00748/001-00749/001-00750/001  
00756/001-00757/001-00758/001-00759/001-00760/001-00761/001  
Date du prélèvement : 16-10-2013  
Lieu du prélèvement : Compla 1, Compla 2 et Dayere  
Date de réception : 12-08-2013  
But des analyses : Recherche de résidus de pesticides  
Période d'analyse : Du 29 octobre 17 décembre 2013  
Identité du préleveur : LNSP  
Nature des échantillons : Sol

---

**Avertissement : Ce document ne doit pas être reproduit sans autorisation écrite du LNSP.**  
**Ce rapport d'analyse n'est valable que pour l'échantillon analysé.**  
**007466-00747-00748-00749-00750-00756-00757-00758-00759-00760-00761 Echantillons de sol**

| Pesticides Recherchés                       | Méthodes                               | Désignation et résultats          |                                   |                                   |                                   |                                 |                                    |                                    |                                   |                                    |                                    | Valeurs guides **<br>(µg/l) |                                  |   |
|---------------------------------------------|----------------------------------------|-----------------------------------|-----------------------------------|-----------------------------------|-----------------------------------|---------------------------------|------------------------------------|------------------------------------|-----------------------------------|------------------------------------|------------------------------------|-----------------------------|----------------------------------|---|
|                                             |                                        | 00746/001<br>BIO. 1 /<br>Compla 1 | 00747/001<br>BIO. 2 /<br>Compla 1 | 00748/001<br>BIO. 3 /<br>Compla 1 | 00749/001<br>BIO. 4 /<br>Compla 1 | 00750/001<br>BIO. 5 /<br>Dayere | 00756/001<br>CONV. 1 /<br>Compla 2 | 00757/001<br>CONV. 2 /<br>Compla 2 | 00758/001<br>CONV.3 /<br>Compla 2 | 00759/001<br>CONV. 4 /<br>Compla 2 | 00760/001<br>CONV. 5 /<br>Compla 2 |                             | 00761/001<br>CONV. 6 /<br>Dayere |   |
| <b>PYRETHRINOIDE DE SYNTHESE</b>            | Méthode Multi résidus d'origine DFG*** | < LD*                             | < LD*                             | < LD*                             | < LD*                             | < LD*                           | < LD*                              | < LD*                              | < LD*                             | < LD*                              | < LD*                              | < LD*                       | -                                |   |
| Cypermethrine                               |                                        | < LD*                             | < LD*                             | < LD*                             | < LD*                             | < LD*                           | < LD*                              | < LD*                              | < LD*                             | < LD*                              | < LD*                              | < LD*                       | < LD*                            | - |
| Deltamethrine                               |                                        | < LD*                             | < LD*                             | < LD*                             | < LD*                             | < LD*                           | < LD*                              | < LD*                              | < LD*                             | < LD*                              | < LD*                              | < LD*                       | < LD*                            | - |
| Lamda Cyhalothrine                          |                                        | < LD*                             | < LD*                             | < LD*                             | < LD*                             | < LD*                           | < LD*                              | < LD*                              | < LD*                             | < LD*                              | < LD*                              | < LD*                       | < LD*                            | - |
| Permethrine                                 |                                        | < LD*                             | < LD*                             | < LD*                             | < LD*                             | < LD*                           | < LD*                              | < LD*                              | < LD*                             | < LD*                              | < LD*                              | < LD*                       | < LD*                            | - |
| Tetramethrine                               |                                        | < LD*                             | < LD*                             | < LD*                             | < LD*                             | < LD*                           | < LD*                              | < LD*                              | < LD*                             | < LD*                              | < LD*                              | < LD*                       | < LD*                            | - |
| <b>ORGANOPHOSPHORES / COMPOSES AZOTES :</b> |                                        | < LD*                             | < LD*                             | < LD*                             | < LD*                             | < LD*                           | < LD*                              | < LD*                              | < LD*                             | < LD*                              | < LD*                              | < LD*                       | < LD*                            | - |
| Chlorpyrifos ethyl                          |                                        | < LD*                             | < LD*                             | < LD*                             | < LD*                             | < LD*                           | < LD*                              | < LD*                              | < LD*                             | < LD*                              | < LD*                              | < LD*                       | < LD*                            | - |
| Chlorpyrifos methyl                         |                                        | < LD*                             | < LD*                             | < LD*                             | < LD*                             | < LD*                           | < LD*                              | < LD*                              | < LD*                             | < LD*                              | < LD*                              | < LD*                       | < LD*                            | - |
| Diazinon                                    |                                        | < LD*                             | < LD*                             | < LD*                             | < LD*                             | < LD*                           | < LD*                              | < LD*                              | < LD*                             | < LD*                              | < LD*                              | < LD*                       | < LD*                            | - |
| Dichlorvos                                  |                                        | < LD*                             | < LD*                             | < LD*                             | < LD*                             | < LD*                           | < LD*                              | < LD*                              | < LD*                             | < LD*                              | < LD*                              | < LD*                       | < LD*                            | - |
| Dimethoate                                  |                                        | < LD*                             | < LD*                             | < LD*                             | < LD*                             | < LD*                           | < LD*                              | < LD*                              | < LD*                             | < LD*                              | < LD*                              | < LD*                       | < LD*                            | - |
| Diuron                                      |                                        | < LD*                             | < LD*                             | <b>29,03</b>                      | < LD*                             | < LD*                           | < LD*                              | <b>22,63</b>                       | <b>105.50</b>                     | < LD*                              | < LD*                              | < LD*                       | < LD*                            | - |
| Glyphosate                                  |                                        | < LD*                             | < LD*                             | < LD*                             | < LD*                             | < LD*                           | < LD*                              | < LD*                              | < LD*                             | < LD*                              | < LD*                              | < LD*                       | < LD*                            | - |
| Fenitrothion                                |                                        | < LD*                             | < LD*                             | < LD*                             | < LD*                             | < LD*                           | < LD*                              | < LD*                              | < LD*                             | < LD*                              | < LD*                              | < LD*                       | < LD*                            | - |
| Fipronil                                    | < LD*                                  | < LD*                             | < LD*                             | < LD*                             | < LD*                             | < LD*                           | < LD*                              | < LD*                              | < LD*                             | < LD*                              | < LD*                              | < LD*                       | -                                |   |
| Malathion                                   | < LD*                                  | < LD*                             | < LD*                             | < LD*                             | < LD*                             | < LD*                           | < LD*                              | < LD*                              | < LD*                             | < LD*                              | < LD*                              | < LD*                       | -                                |   |
| Methidathion                                | < LD*                                  | < LD*                             | < LD*                             | < LD*                             | < LD*                             | < LD*                           | < LD*                              | < LD*                              | < LD*                             | < LD*                              | < LD*                              | < LD*                       | -                                |   |
| Omethoate                                   | < LD*                                  | < LD*                             | < LD*                             | < LD*                             | < LD*                             | < LD*                           | < LD*                              | < LD*                              | < LD*                             | < LD*                              | < LD*                              | < LD*                       | -                                |   |
| Parathion ethyl                             | < LD*                                  | < LD*                             | < LD*                             | < LD*                             | < LD*                             | < LD*                           | < LD*                              | < LD*                              | < LD*                             | < LD*                              | < LD*                              | < LD*                       | -                                |   |
| Pyridaphenthion                             | < LD*                                  | < LD*                             | < LD*                             | < LD*                             | < LD*                             | < LD*                           | < LD*                              | < LD*                              | < LD*                             | < LD*                              | < LD*                              | < LD*                       | -                                |   |
| Pyrimiphos methyl                           | < LD*                                  | < LD*                             | < LD*                             | < LD*                             | < LD*                             | < LD*                           | < LD*                              | < LD*                              | < LD*                             | < LD*                              | < LD*                              | < LD*                       | -                                |   |
| <b>CARBAMATES et AUTRES:</b>                | < LD*                                  | < LD*                             | < LD*                             | < LD*                             | < LD*                             | < LD*                           | < LD*                              | < LD*                              | < LD*                             | < LD*                              | < LD*                              | < LD*                       | -                                |   |
| Imazalil                                    | < LD*                                  | < LD*                             | < LD*                             | < LD*                             | < LD*                             | < LD*                           | < LD*                              | < LD*                              | < LD*                             | < LD*                              | < LD*                              | < LD*                       | -                                |   |
| Quintozene                                  | < LD*                                  | < LD*                             | < LD*                             | < LD*                             | < LD*                             | < LD*                           | < LD*                              | < LD*                              | < LD*                             | < LD*                              | < LD*                              | < LD*                       | -                                |   |

(\*) : Limite de Détection

(\*\*\*) : DFG : Deutsche Forschungsgemeinschaft

**Avertissement : Ce document ne doit pas être reproduit sans autorisation écrite du LNSP.  
Ce rapport d'analyse n'est valable que pour l'échantillon analysé.  
007466-00747-00748-00749-00750-00756-00757-00758-00759-00760-00761 Echantillons de sol**

## Remarque

Les molécules de pesticides (Alléthrine Benzoylprop-ethyl, Bromacil, Chloroneb, Dioxacarb, Pyridate) ont été retrouvées dans certains échantillons (voir le tableau ci-dessous),

| Molécule des pesticides | Désignation et résultats          |                                   |                                   |                                  |                                    |                                    |                                   |                                    |                                    |                                  |
|-------------------------|-----------------------------------|-----------------------------------|-----------------------------------|----------------------------------|------------------------------------|------------------------------------|-----------------------------------|------------------------------------|------------------------------------|----------------------------------|
|                         | 00746/001<br>BIO. 1 /<br>Compla 1 | 00747/001<br>BIO. 2 /<br>Compla 1 | 00749/001<br>BIO. 4 /<br>Compla 1 | 00750/00<br>1 BIO. 5<br>/ Dayere | 00756/001<br>CONV. 1 /<br>Compla 2 | 00757/001<br>CONV. 2 /<br>Compla 2 | 00758/001<br>CONV.3 /<br>Compla 2 | 00759/001<br>CONV. 4 /<br>Compla 2 | 00760/001<br>CONV. 5 /<br>Compla 2 | 00761/001<br>CONV. 6 /<br>Dayere |
| Alléthrine              |                                   | +                                 |                                   |                                  |                                    |                                    |                                   |                                    |                                    |                                  |
| Benzoylprop-ethyl       |                                   |                                   |                                   |                                  |                                    |                                    | +                                 |                                    |                                    |                                  |
| Bromacil                |                                   |                                   |                                   |                                  | +                                  |                                    |                                   |                                    |                                    |                                  |
| Chloroneb               | +                                 | +                                 | +                                 | +                                |                                    |                                    | +                                 | +                                  | +                                  |                                  |
| Dioxacarb               |                                   |                                   |                                   | +                                |                                    |                                    |                                   |                                    |                                    |                                  |
| Pyridate                |                                   |                                   |                                   |                                  | +                                  |                                    |                                   |                                    |                                    |                                  |

**Le Chef de service des  
Contaminants, des Pesticides  
et des Engrais**

**Le Directeur de la Toxicologie  
du Contrôle de l'Environnement  
et de l'Hygiène Publique P/O**

**Abdoulaye SAKO**

**Mme Bernadette P. SOURABIE**

---

**Avertissement : Ce document ne doit pas être reproduit sans autorisation écrite du LNSP.  
Ce rapport d'analyse n'est valable que pour l'échantillon analysé.  
007466-00747-00748-00749-00750-00756-00757-00758-00759-00760-00761 Echantillons de sol**
